# Supplementary material for: A New Species of Nanorana (Anura: Dicroglossidae) from Northwestern Yunnan, China, with Comments on the Taxonomy of Nanorana arunachalensis and Allopaa
Source: MDPI journal article supplement (doi:10.3390/ani13213427), 2023-11-06
Supplement: s1 [file s1]

## Support information

### **Specimens of other *Nanorana* (*Nanorana*) species examined in this study**

A total of five specimens of *Nanorana bangdaensis* (KIZ20181001–20181005), eight specimens of *Nanorana parkeri* (KIZ20181101–20181108), eight specimens of *Nanorana pleskei* (KIZ 008807–008814), and eight specimens of *Nanorana ventripunctata* (GXNU YU130019–130022, YU090163, YU000498, YU000502, and YU000503) were examined. The specimens of *N. bangdaensis* were collected from Bangda, Baxoi, Tibet, China and were deposited at Kunming Institute of Zoology, Chinese Academy of Sciences (KIZ). The specimens of *N. parkeri* were collected from Jilong, Rikaze, Tibet, China and were deposited at KIZ. The specimens of *N. pleskei* were collected from Xinduqiao, Sichuan, China and were deposited at KIZ. The specimens of *N. ventripunctata* were collected from Xiaozhongdian (GXNU YU130019–130022) and Bitahai (GXNU YU090163, GXNU YU000498, GXNU YU000502, and GXNU YU000503), Yunnan, China and were deposited at Guangxi Normal University (GXNU).

#### ***Nanorana bangdaensis*:**

Males: KIZ20181001, KIZ20181003, KIZ20181004, KIZ20181005.

Female: KIZ20181002.

#### ***Nanorana parkeri*:**

Males: KIZ20181101, KIZ20181102, KIZ20181103, KIZ20181106.

Females: KIZ20181104, KIZ20181105, KIZ20181107, KIZ20181108.

#### ***Nanorana pleskei*:**

Males: KIZ008807, KIZ008808, KIZ008809, KIZ008810.

Females: KIZ008811, KIZ008812, KIZ008813, KIZ008814.

#### ***Nanorana ventripunctata*:**

Males: GXNU YU130021, GXNU YU130022, GXNU YU090163, GXNU YU000502, GXNU YU000503.

Females: GXNU YU130019, GXNU YU130020, GXNU YU000498.

**Table S1.** Measurements (in mm) of *N. pleskei* collected from Xinduqiao, Sichuan, China

| Character | KIZ<br>008807 | KIZ<br>008808 | KIZ<br>008809 | KIZ<br>008810 | KIZ<br>008811 | KIZ<br>008812 | KIZ<br>008813 | KIZ<br>008814 |
|-----------|---------------|---------------|---------------|---------------|---------------|---------------|---------------|---------------|
| Sex       | M             | M             | M             | M             | F             | F             | F             | F             |
| SVL       | 34.8          | 34.6          | 34.5          | 33.0          | 39.7          | 40.2          | 41.6          | 37.9          |
| HL        | 12.0          | 11.1          | 11.6          | 10.6          | 12.6          | 11.9          | 12.8          | 12.0          |
| HW        | 11.5          | 11.5          | 11.7          | 10.4          | 12.6          | 12.5          | 12.7          | 11.9          |
| SL        | 4.8           | 5.1           | 5.3           | 4.6           | 5.7           | 5.3           | 5.5           | 5.1           |
| IND       | 3.0           | 2.9           | 2.8           | 3.0           | 3.5           | 2.9           | 3.5           | 3.3           |
| IOD       | 1.7           | 1.6           | 1.4           | 1.8           | 1.8           | 1.7           | 1.7           | 2.0           |
| UEW       | 2.4           | 2.8           | 2.5           | 2.2           | 2.7           | 2.8           | 2.9           | 2.6           |
| ED        | 4.4           | 3.9           | 4.2           | 3.8           | 4.6           | 4.5           | 4.4           | 3.8           |
| TD        | 1.5           | 1.4           | 1.5           | 1.3           | 1.7           | 1.5           | 1.7           | 1.7           |
| DNE       | 1.6           | 2.2           | 2.0           | 1.9           | 2.3           | 2.3           | 2.1           | 2.3           |
| FHL       | 13.9          | 13.2          | 14.3          | 12.6          | 15.7          | 14.6          | 14.6          | 14.8          |
| TL        | 14.5          | 14.2          | 14.8          | 13.3          | 15.3          | 14.6          | 14.9          | 14.7          |
| TFL       | 24.0          | 24.6          | 24.9          | 22.1          | 26.9          | 24.7          | 25.6          | 25.8          |
| FL        | 17.2          | 17.5          | 17.8          | 16.0          | 18.4          | 17.4          | 17.9          | 18.0          |

**Table S2.** Measurements (in mm) of *N. ventripunctata*

| Character | GXNU<br>YU130019 | GXNU<br>YU130020 | GXNU<br>YU130021 | GXNU<br>YU130022 | GXNU<br>YU000502 | GXNU<br>YU000503 | GXNU<br>YU090163 | GXNU<br>YU000498 |
|-----------|------------------|------------------|------------------|------------------|------------------|------------------|------------------|------------------|
| Sex       | F                | F                | M                | M                | M                | M                | M                | F                |
| SVL       | 47.1             | 42.0             | 36.7             | 35.1             | 43.7             | 35.7             | 42.9             | 49.6             |
| HL        | 12.0             | 11.3             | 11.0             | 10.3             | 13.0             | 10.4             | 13.1             | 14.1             |
| HW        | 14.5             | 13.1             | 11.7             | 11.5             | 14.5             | 12.1             | 14.5             | 15.5             |
| SL        | 5.8              | 4.7              | 4.6              | 4.4              | 5.1              | 4.5              | 5.3              | 5.7              |
| IND       | 2.9              | 2.9              | 2.4              | 2.5              | 3.0              | 2.4              | 2.9              | 3.1              |
| IOD       | 2.2              | 2.1              | 1.6              | 1.8              | 2.6              | 1.9              | 2.4              | 2.7              |
| UEW       | 3.3              | 3.2              | 2.5              | 2.5              | 2.9              | 2.5              | 3.0              | 2.9              |
| ED        | 4.8              | 4.4              | 4.0              | 3.9              | 4.6              | 3.7              | 4.6              | 5.0              |
| TD        | 1.8              | 1.6              | 1.6              | 1.6              | 1.8              | 1.3              | 2.0              | 2.2              |
| DNE       | 1.9              | 1.7              | 1.6              | 1.7              | 2.0              | 1.5              | 2.1              | 2.2              |
| FHL       | 20.0             | 17.5             | 15.9             | 15.4             | 20.1             | 17.1             | 19.3             | 21.2             |
| TL        | 20.1             | 18.2             | 16.0             | 14.9             | 19.6             | 15.9             | 20.6             | 21.8             |
| TFL       | 33.7             | 29.4             | 25.8             | 24.4             | 33.4             | 26.7             | 33.5             | 35.4             |
| FL        | 23.7             | 22.3             | 18.7             | 18.0             | 24.1             | 19.9             | 24.2             | 25.1             |
